# Supplementary material for: One-pot synthesis of water-soluble and carboxyl-functionalized β-NaYF4:Yb,Er(Tm) upconversion nanocrystals and their application for bioimaging
Source: Royal Society of Chemistry journal article supplement (doi:10.1039/c2jm31572f), 2012-01-01
Supplement: c2jm31572f.pdf [file c2jm31572f.pdf]

## Electronic Supplementary Information

**Authors Name:** Zhe Wang, Chenghui Liu\*, Lijuan Chang and Zhengping Li\*

**Affiliation:** Key Laboratory of Medicinal Chemistry and Molecular Diagnosis, Ministry of Education; College of Chemistry and Environmental Science, Hebei University, Baoding 071002, Hebei Province, P. R. China.

**Title of the primary paper:** One-Pot Synthesis of Water-soluble and Carboxyl-Functionalized  $\beta$ -NaYF<sub>4</sub>:Yb,Er(Tm) Upconversion Nanocrystals and Their Application for Bioimaging

Corresponding Author: Dr. Chenghui Liu, [liuch@hbu.edu.cn](mailto:liuch@hbu.edu.cn); Prof. Zhengping Li, [lzpbd@hbu.edu.cn](mailto:lzpbd@hbu.edu.cn)

In this supplement, the effect of NaCl content (Fig. S1), PAAs (Mw~2100) (Fig. S2) and the combination of PAA/NaCl (Fig. S3) on the synthesis of NaYF<sub>4</sub> NCs, the effect of PAAs content on the luminescence of the UCNPs (Fig. S4), and the LC-MS/MS analysis result for the UCNPs-transferrin conjugates (Fig. S5) are presented.

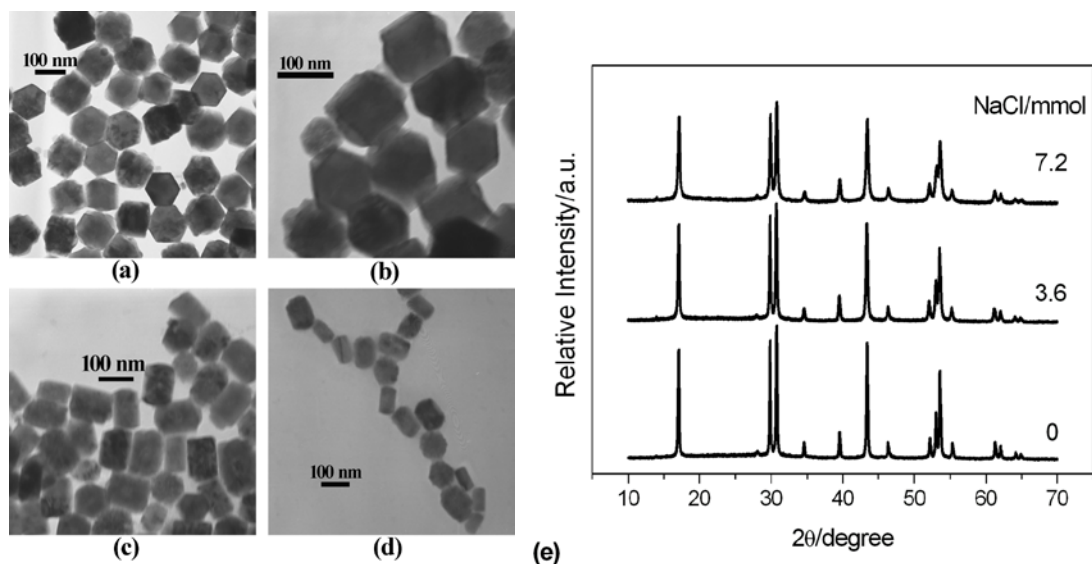

**Fig. S1** Effect of NaCl on the synthesis of NaYF<sub>4</sub>:Yb,Er UCNP. (a-d): TEM images of the NaYF<sub>4</sub>:Yb,Er UCNP prepared by using 0, 1.2, 3.6, 7.2 mmol NaCl, respectively; (e): corresponding XRD patterns. Other experimental conditions: PAAs (Mw 5100), 0.5 g; RECl<sub>3</sub>, 1.2 mmol; NH<sub>4</sub>F, 5 mmol; 200 °C for 12 h.

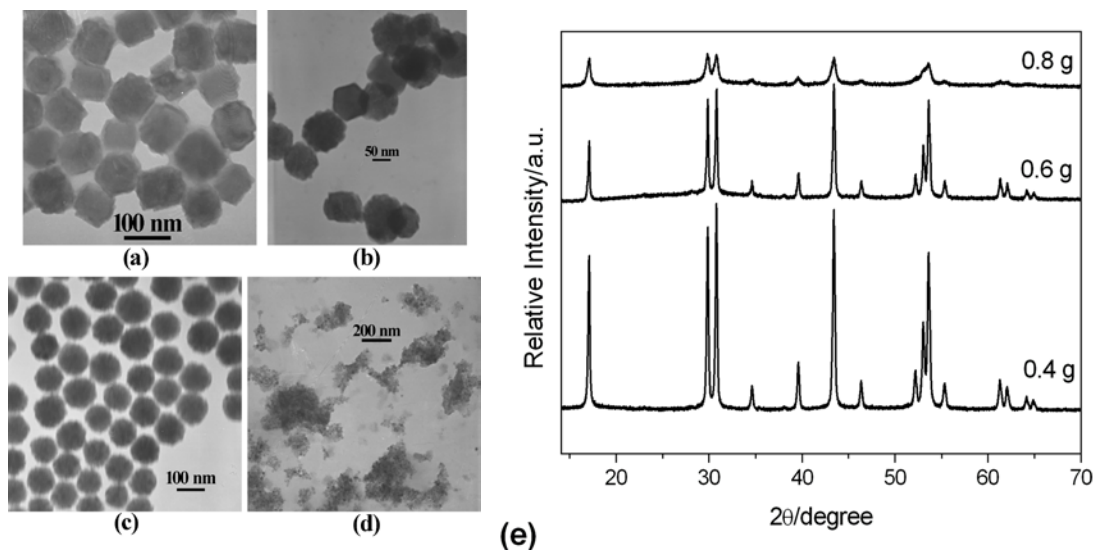

**Fig. S2** (a-c): Typical TEM images of the NaYF<sub>4</sub>:Yb,Er UCNP prepared by using 0.4, 0.6, 0.8 g PAAs with Mw 2100; (d): TEM image of the NaYF<sub>4</sub>:Yb,Er UCNP prepared by using 0.38 g PAA (Mw 1800). (e): XRD patterns corresponding to the UCNP shown in image (a-c). Other experimental conditions: RECl<sub>3</sub>, 1.2 mmol; NaCl, 2.4 mmol; NH<sub>4</sub>F, 5 mmol; 200 °C for 12 h.

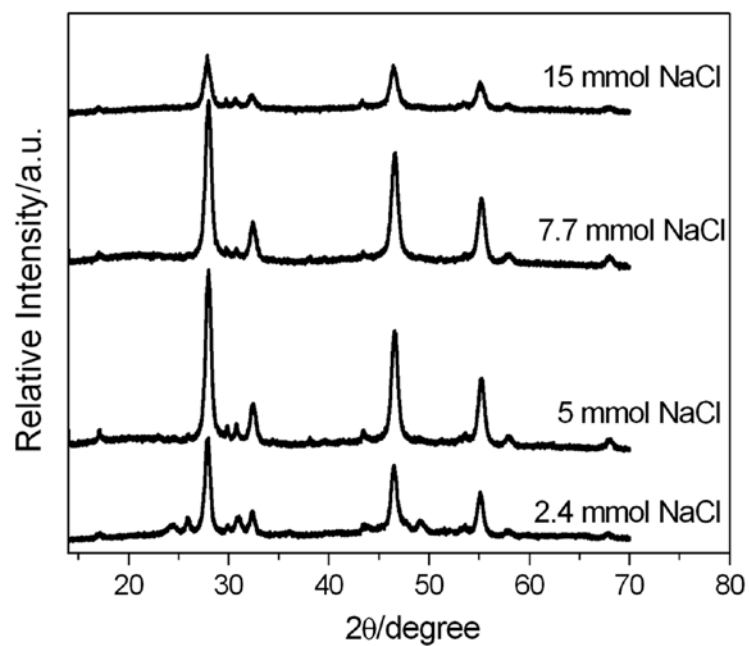

**Fig. S3** XRD patterns of the UCNPs obtained in the presence of PAA (Mw 1800) with different NaCl content. Other experimental conditions: RECl<sub>3</sub>, 1.2 mmol; PAA, 0.38 g; NH<sub>4</sub>F, 5 mmol; 200 °C for 12 h.

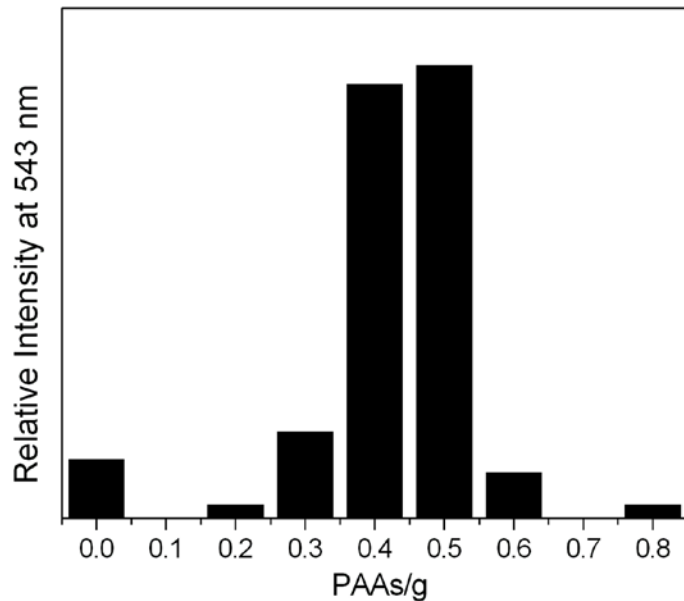

**Fig. S4** Effect of PAAs content on the UC luminescence of the as-synthesized NaYF<sub>4</sub>:Yb,Er UCNPs.

|                                                                               |           |           |           |        |      |       |          |      |        |                                                                                                                                                                                                                                                                                                                          |
|-------------------------------------------------------------------------------|-----------|-----------|-----------|--------|------|-------|----------|------|--------|--------------------------------------------------------------------------------------------------------------------------------------------------------------------------------------------------------------------------------------------------------------------------------------------------------------------------|
| gi 553788 Mass: 55207 Score: 610 Matches: 74(26) Sequences: 12(7) emPAI: 0.58 |           |           |           |        |      |       |          |      |        |                                                                                                                                                                                                                                                                                                                          |
| transferrin [Homo sapiens]                                                    |           |           |           |        |      |       |          |      |        |                                                                                                                                                                                                                                                                                                                          |
| Query                                                                         | Observed  | Mr(expt)  | Mr(calc)  | Delta  | Miss | Score | Expect   | Rank | Unique | Peptide                                                                                                                                                                                                                                                                                                                  |
| <a href="#">481</a>                                                           | 598.2840  | 1194.5533 | 1194.5452 | 0.0082 | 0    | 49    | 0.0034   | 1    | U      | K.DSGFQMNQLR.G <a href="#">482</a> <a href="#">483</a> <a href="#">484</a> <a href="#">485</a>                                                                                                                                                                                                                           |
| <a href="#">584</a>                                                           | 625.3132  | 1248.6118 | 1248.5986 | 0.0132 | 0    | 60    | 0.00031  | 1    | U      | K.SASDLTWDNLK.G <a href="#">583</a>                                                                                                                                                                                                                                                                                      |
| <a href="#">661</a>                                                           | 637.3319  | 1272.6492 | 1272.6462 | 0.0030 | 0    | 34    | 0.14     | 1    | U      | K.HSTIFENLANK.A <a href="#">663</a> <a href="#">664</a>                                                                                                                                                                                                                                                                  |
| <a href="#">683</a>                                                           | 638.8251  | 1275.6355 | 1275.6248 | 0.0108 | 0    | 53    | 0.0014   | 1    | U      | K.EFQLFSSEPHGK.D <a href="#">684</a> <a href="#">685</a>                                                                                                                                                                                                                                                                 |
| <a href="#">693</a>                                                           | 642.2935  | 1282.5725 | 1282.5618 | 0.0107 | 0    | 52    | 0.00098  | 1    | U      | K.EGYGYTGAFR.C <a href="#">692</a> <a href="#">694</a> <a href="#">695</a>                                                                                                                                                                                                                                               |
| <a href="#">928</a>                                                           | 662.3317  | 1322.6489 | 1322.6401 | 0.0088 | 1    | 58    | 0.00044  | 1    | U      | K.KDSGFQMNQLR.G <a href="#">920</a> <a href="#">921</a> <a href="#">923</a> <a href="#">924</a> <a href="#">925</a> <a href="#">926</a> <a href="#">929</a> <a href="#">930</a> <a href="#">931</a> <a href="#">932</a>                                                                                                  |
| <a href="#">1079</a>                                                          | 689.3567  | 1376.6989 | 1376.6936 | 0.0054 | 1    | 39    | 0.038    | 1    | U      | K.KSASDLTWDNLK.G <a href="#">1080</a>                                                                                                                                                                                                                                                                                    |
| <a href="#">1433</a>                                                          | 739.8791  | 1477.7436 | 1477.7275 | 0.0161 | 0    | 67    | 3.7e-005 | 1    | U      | K.MYLGVEYVTAIR.N <a href="#">1425</a> <a href="#">1426</a> <a href="#">1427</a> <a href="#">1428</a> <a href="#">1429</a> <a href="#">1430</a> <a href="#">1431</a> <a href="#">1432</a> <a href="#">1434</a> <a href="#">1435</a>                                                                                       |
| <a href="#">1537</a>                                                          | 746.3849  | 1490.7551 | 1490.7518 | 0.0034 | 1    | 34    | 0.099    | 1    | U      | K.SKDFQLFSSEPHGK.D <a href="#">1530</a> <a href="#">1546</a> <a href="#">1549</a>                                                                                                                                                                                                                                        |
| <a href="#">1562</a>                                                          | 747.8754  | 1493.7361 | 1493.7224 | 0.0137 | 0    | (15)  | 5.3      | 1    | U      | K.MYLGVEYVTAIR.N                                                                                                                                                                                                                                                                                                         |
| <a href="#">1794</a>                                                          | 789.4187  | 1576.8229 | 1576.8072 | 0.0157 | 0    | 24    | 0.71     | 1    | U      | R.TAGWNIPMGLLYNK.I <a href="#">1779</a> <a href="#">1781</a> <a href="#">1782</a> <a href="#">1783</a> <a href="#">1784</a> <a href="#">1785</a> <a href="#">1786</a> <a href="#">1791</a> <a href="#">1792</a> <a href="#">1796</a> <a href="#">1797</a> <a href="#">1798</a> <a href="#">1800</a> <a href="#">1803</a> |
| <a href="#">1925</a>                                                          | 815.4189  | 1628.8233 | 1628.8086 | 0.0146 | 0    | 25    | 0.97     | 1    | U      | K.EDPQTFYYAVAVVK.K <a href="#">1919</a> <a href="#">1920</a> <a href="#">1921</a> <a href="#">1922</a> <a href="#">1923</a> <a href="#">1924</a> <a href="#">1926</a> <a href="#">1927</a> <a href="#">1928</a> <a href="#">1930</a> <a href="#">1931</a>                                                                |
| <a href="#">3126</a>                                                          | 1035.5289 | 2069.0433 | 2069.0218 | 0.0215 | 0    | 8     | 20       | 1    | U      | K.EDLWELLNQAQEHFGK.D                                                                                                                                                                                                                                                                                                     |

Fig. S5 LC-MS/MS analysis result for the  $\beta$ -NaYF<sub>4</sub>:Yb,Er-transferrin conjugates

LC-MS/MS analysis was carried out to test whether the transferrin was successfully conjugated with the  $\beta$ -NaYF<sub>4</sub>:Yb,Er UCNPs. After the crosslinking procedures stated in the Experimental Section, the products were purified by centrifugation and then treated with trypsin in 50 mM NH<sub>4</sub>HCO<sub>3</sub> solution at 37 °C overnight to conduct the protein hydrolysis. Finally, the UCNPs were discarded through centrifugation and the supernatant was analyzed on an ESI-Q-TOF LC-MS/MS instrument (Bruker, Germany). All Mass data were submitted to Mascot Searching Engine ([www.matrixscience.com](http://www.matrixscience.com)) to identify the matched proteins from primary sequence databases.

The searching result was shown in Fig. S5 and one could see that several unique peptides which specifically belong to transferrin were detected and identified, clearly indicating the successful conjugation between the UCNPs and the transferrin.
